# Supplementary material
Source: PubMed Central journal article supplement (PMC2841874)
Supplement: 0912959107_pnas.200912959SI.pdf [file 0912959107_pnas.200912959SI.pdf]

# Supporting Information

Bullard et al. 10.1073/pnas.0912959107

## SI Text

### Identifying Ortholog Pairs with Differential Allele-Specific Expression.

A natural measure of differential expression between orthologs is the within-lane log-ratio of their per-base sequencing read counts. In the present experiment, by virtue of the paired design (interspecies hybrid assayed within each lane), technical effects, such as differences across lanes, flow-cells, or sequencing centers, were mitigated by forming such relative measures of expression between orthologs within a given lane. Therefore, we employed as statistics for differential expression (DE) the averages of the within-lane started log-ratios of per-base read counts for biological replicates 1 and 2, respectively. The started (natural) logarithm, defined as  $\text{slg}(x) = \ln(x+1)$ , was used to handle zero counts.

We sought to generate sequence-specific null distributions that accounted for the influence of differing starting bases of a read (e.g., G and C bases) on its sequenceability. For this purpose, we resampled, for each ortholog pair, the base-level read counts of the two alleles to form “null” ortholog pairs with no differential expression and the same marginal nucleotide distributions as the original orthologs (Fig. 1). Specifically, for a given gene, let  $L_b$  and  $L_c$  denote, respectively, the lengths of the *S. bayanus* and *S. cerevisiae* orthologs [only uniquely-mappable (2) bases are counted], and let  $\pi_b = [\pi_b(A), \pi_b(C), \pi_b(G), \pi_b(T)]$  and  $\pi_c = [\pi_c(A), \pi_c(C), \pi_c(G), \pi_c(T)]$  denote, respectively, the marginal nucleotide frequencies of the *S. bayanus* and *S. cerevisiae* orthologs. We began by resampling the original base-level read counts of the *S. bayanus* ortholog. To create null *S. bayanus* read counts, we sampled  $L_b$  base-level read counts at random, with replacement, with uniform probability  $1/L_b$ . Next, to create null *S. cerevisiae* read counts, we sampled, from the original *S. bayanus* ortholog,  $L_c$  base-level read counts at random, with replacement, with nucleotide-specific probabilities  $\pi_c/(L_b \pi_b)$ . For each such ortholog pair, we computed a null DE statistic, defined as the average (over all lanes for biological replicates 1 and 2, respectively) log-ratio of *S. bayanus* to *S. cerevisiae* null per-base read counts. Repeating the above procedure 10,000 times yielded a null distribution of DE statistics, based on the original *S. bayanus* read counts, which preserved the marginal nucleotide distributions of the two orthologs, and to which we compared the observed DE statistic to obtain a two-sided  $P$  value. We then repeated the entire resampling procedure using the base-level read counts of the *S. cerevisiae* ortholog. Finally, we conservatively retained the maximum of the  $P$  values based on the *S. bayanus* and *S. cerevisiae* resampled counts. The complete procedure yielded, for each of the  $J = 4,238$  uniquely-mappable (2) ortholog pairs, an average within-lane paired log-ratio  $f_j$  of *S. bayanus* to *S. cerevisiae* per-base read counts and its associated  $P$  value  $P_j$ , assessing the significance of the differential allele-specific expression,  $j = 1, \dots, J$ . We applied the procedure separately to each of the two biological replicates.

We note that this method is general and modular, in that it can be applied to other DE statistics (e.g., paired  $t$ -statistics, GLM-based  $t$ -statistics) and sequence features (e.g., dinucleotide frequencies).

**Quantitative RT-PCR.** For Fig. S2, pairs of orthologs were amplified separately, each using allele-specific primers designed with Primer3 (<http://www.bioinformatics.nl/cgi-bin/primer3plus/primer3plus.cgi>). The web edition of Beacon Designer (<http://www.premierbiosoft.com/qOligo/Oligo.jsp?PID=1>) was used to screen for hairpins and primer dimerization, and BLAST (<http://www.ncbi.nlm.nih.gov/BLAST>) was used to check that candidate primers were specific to a

single locus within the combined *S. bayanus* and *S. cerevisiae* genomes. Primers were synthesized by Elim Biopharmaceuticals.

DNase-treated total RNA from biological replicate 1 was converted to cDNA using the SuperScript III First Strand Synthesis System with oligo(dT) primers (Invitrogen), following the manufacturer's instructions. RT-PCR reactions were performed using the DyNAmo HS SYBR Green qPCR mix (Finnzymes) in 96-well plates on a Stratagene Mx3000p thermocycler. To control for differences in amplification efficiency between primers, expression levels for each ortholog were normalized based on a primer-specific standard curve of genomic DNA. Genomic DNA was isolated from the OZY27 hybrid as described (3).

Genes to be tested by RT-PCR were selected to span a wide range of expression fold-changes and  $P$  values while still showing significant differences in allele-specific expression levels according to the procedure in Fig. 1. For each of 22 genes (Table S3), we performed three cDNA amplifications and two standard curve replicates per ortholog. For Fig. S2, the resulting fold-changes from RT-PCR were compared with fold-changes measured by RNA-seq for biological replicate 1.

### Testing for Directional Imbalance in *cis*-Regulatory Effects Across Pathways.

For a given biological replicate and gene  $j = 1, \dots, J$ , a simple and robust measure of directional differential expression is given by the product  $\text{sign}(f_j) I(p_j \leq \alpha)$ . This statistic takes on three values: 1 for genes significantly up-regulated in *S. bayanus*,  $-1$  for genes significantly up-regulated in *S. cerevisiae*, and 0 otherwise. We assessed significance at a common single test level  $\alpha = 0.05$ . We defined a conservative, combined directional DE statistic  $S_j$  for the two biological replicates as the common value of the statistic if both replicates agreed and zero otherwise. For analyses of coregulated gene groups, we used the regulons defined in (1), eliminating groups with fewer than five genes and those with at least 50% overlap with another group (for the latter, we retained the larger of the two groups). For the Gene Ontology groups, we used the Biological Process categories from the GO slim annotations maintained by the Saccharomyces Genome Database ([http://downloads.yeastgenome.org/literature\\_curation/go\\_slim\\_mapping.tab](http://downloads.yeastgenome.org/literature_curation/go_slim_mapping.tab)). For a given pathway, we measured the extent of directional differential expression by adding the gene-level statistics  $S_j$  of the pathway members. Let  $n_k$  and  $T_k$  denote, respectively, the cardinality and directional DE statistic of the  $k$ th pathway,  $k = 1, \dots, K$ . The  $K=167$  gene groups defined by coregulation and the  $K=38$  groups defined by Gene Ontology were analyzed separately. For each set, we assessed the significance of the directional DE for pathway  $k$  by comparing the observed statistic  $T_k$  with a null distribution of 100,000 such statistics obtained by resampling groups of  $n_k$  genes at random, without replacement from the full set of  $J$  genes. Let  $P_k$  denote the resulting (unadjusted) two-sided  $P$  value. At a given unadjusted  $P$  value threshold  $P_0$ , we estimated the expected number of false-positive pathways as the product of  $P_0$  and the number of tests; we set  $P_0$  to attain as close to one false-positive pathway per set as possible. The directional DE statistics  $T_k$  and  $P$  values  $P_k$  are reported in Table 1. For comparison, results from the Benjamini-Hochberg multiple testing procedure (2), which controls the false-discovery rate, are given in Table S8.

We note that this directional DE method is general and modular, in that it can be applied to other gene-level statistics [e.g.,  $S_j = \text{sign}(f_j) (1 - p_j)$ ] and gene-group-level statistics (e.g., quantiles of  $S_j$ ).





## Other Supporting Information Files

### Table S1. Comparing methods to assess significance of differential expression in RNA-seq

[Table S1 \(DOC\)](#)

Each cell represents the number of ortholog pairs with the indicated qualitative measure of differential expression between alleles as called by either of two procedures to assess statistical significance. “Resampling” gives data from the procedure shown in Fig. 1 of the main text. “glm” gives results from an analysis in which *P* values for differential expression between the orthologs were assigned based on a Poisson generalized linear model (R function glm) taking as input the number of reads mapping to each ortholog and the total number of mapped reads in each Solexa sequencing lane. +1 represents ortholog pairs for which the *S. bayanus* allele was expressed significantly higher than the *S. cerevisiae* allele at *P* < 0.05, -1 represents ortholog pairs for which the *S. cerevisiae* allele was expressed significantly higher than the *S. bayanus* allele, and 0 represents all other ortholog pairs.

### Table S2. RNA-seq data

[Table S2 \(DOC\)](#)

Bay, total reads mapping uniquely to *S. bayanus* in the indicated Solexa lane (assignment of samples to lanes is listed in the caption to Fig. S3); Bay.bio, sum of all reads mapping uniquely to *S. bayanus* across all lanes of the indicated biological replicate; benj.p, adjusted *P* value for max(bio.1.marginal, bio.2.marginal) from the Benjamini–Hochberg procedure; Cer, Total reads mapping uniquely to *S. cerevisiae* in the indicated Solexa lane; Cer.bio, sum of all reads mapping uniquely to *S. cerevisiae* across all lanes of the indicated biological replicate; gc.diff, proportion of bases in the *S. cerevisiae* ortholog that are Gs or Cs, subtracted from the proportion of bases in the *S. bayanus* ortholog that are Gs or Cs; Logratio, started logarithm of the ratio of average per-base allele-specific read counts across lanes for *S. bayanus* over that for *S. cerevisiae*, for the indicated biological replicate; Mappable lengths, number of bases in the indicated ortholog whose mapped reads were usable according to the criteria described in *Materials and Methods*; Marginal, *P* value for differential allele-specific expression from the indicated biological replicate according to the procedure described in *Materials and Methods*; Ortholog.length, raw number of bases of the indicated ortholog before processing; sc\_0.05, indicator variable for significance across replicates at *P* = 0.05; Stats, sign of differential expression from the indicated biological replicate: +1 if level is higher in the *S. bayanus* allele than in *S. cerevisiae*, -1 if level is higher in *S. cerevisiae* than in *S. bayanus*.

### Table S3. RT-PCR data

[Table S3 \(DOC\)](#)

qPCR fold-change: ratio of inferred concentration of *S. bayanus* allele relative to inferred concentration of *S. cerevisiae* allele measured from RT-PCR. RNA-seq *P* value: bio.1.marginal in Table S2; RNA-seq fold-change: per-base read counts for the *S. bayanus* allele, divided by the per-base read counts for the *S. cerevisiae* allele, averaged across lanes for biological replicate 1.

### Table S4. McDonald–Kreitman gene tests (A) and McDonald–Kreitman-like gene tests on upstream regions (B)

[Table S4 \(DOC\)](#)

(A) NSfix, number of nonsynonymous fixed sites; NSpoly, number of nonsynonymous polymorphisms; *P*, *P* value from Fisher’s exact test; Sfix, number of synonymous fixed sites; Spoly, number of synonymous polymorphisms. (B) noncoding\_fixed, number of fixed differences in the region 200 bp upstream of coding start; noncoding\_polymorph, number of polymorphisms in the region 200 bp upstream of coding start; *P*, *P* value from Fisher’s exact test; silent\_fixed, number of fixed synonymous changes in the ORF; silent\_polymorph, number of synonymous polymorphisms in the ORF.
